# Supplementary material
Source: PubMed Central journal article supplement (PMC8448292)

# THE LANCET

## Global Health

### Supplementary appendix

This appendix formed part of the original submission and has been peer reviewed. We post it as supplied by the authors.

Supplement to: Boyce MR, Attal-Juncqua A, Lin J, McKay S, Katz R. Global Fund contributions to health security in ten countries, 2014–20: mapping synergies between vertical disease programmes and capacities for preventing, detecting, and responding to public health emergencies. *Lancet Glob Health* 2021; **9**: e181–88.

## **Appendix**

### **Contents Page**

*Figure 1. Health security capacities and indicators listed in the first edition of the International Health Regulations Joint External Evaluation (JEE) Tool.....1*

*Figure 2. The geographic distribution of the ten countries included in analysis..... 2*

# Appendix

**Figure 1.** Health security capacities and indicators listed in the first edition of the International Health Regulations Joint External Evaluation (JEE) Tool.<sup>8</sup>

| Goal                                                      | Capacity                                           | Joint External Evaluation Tool Indicator                                                                                                                                |
|-----------------------------------------------------------|----------------------------------------------------|-------------------------------------------------------------------------------------------------------------------------------------------------------------------------|
| Prevent public health emergencies                         | P.1 National Legislation, Policy and Financing     | P.1.1. Legislation, laws, regulations, administrative requirements, policies or other government instruments in place are sufficient for implementation of the IHR      |
|                                                           |                                                    | P.1.2. The state can demonstrate that it has adjusted and aligned its domestic legislation, policies, and administrative arrangements to enable compliance with the IHR |
|                                                           | P.2 International Health Regulation Coordination   | P.2.1. A functional mechanism is established for the coordination and integration of relevant sectors in the implementation of IHR                                      |
|                                                           | P.3 Antimicrobial Resistance (AMR)                 | P.3.1. Antimicrobial resistance detection                                                                                                                               |
|                                                           |                                                    | P.3.2. Surveillance of infections caused by antimicrobial resistant pathogens                                                                                           |
|                                                           |                                                    | P.3.3. Healthcare associated infection (HCAI) prevention control programs                                                                                               |
|                                                           |                                                    | P.3.4. Antimicrobial stewardship activities                                                                                                                             |
|                                                           | P.4 Zoonotic Disease                               | P.4.1. Surveillance systems in place for priority zoonotic diseases/pathogens                                                                                           |
|                                                           |                                                    | P.4.2. Veterinary or animal health workforce                                                                                                                            |
|                                                           |                                                    | P.4.3. Mechanisms for responding to infectious zoonoses and potential zoonoses are established and functional                                                           |
|                                                           | P.5 Food Safety                                    | P.5.1. Mechanisms are established and functioning for detecting and responding to foodborne disease & food contamination                                                |
|                                                           | P.6 Biosafety & Biosecurity                        | P.6.1. Whole-of-government biosafety and biosecurity system is in place for human, animal, and agriculture facilities                                                   |
|                                                           |                                                    | P.6.2. Biosafety and biosecurity training practices                                                                                                                     |
|                                                           | P.7 Immunization                                   | P.7.1 Vaccine coverage (measles) as part of national program                                                                                                            |
| P.7.2 National vaccine access and delivery                |                                                    |                                                                                                                                                                         |
| Detect public health emergencies                          | D.1 National Laboratory Systems                    | D.1.1. Laboratory testing for detection of priority diseases                                                                                                            |
|                                                           |                                                    | D.1.2. Specimen referral and transport system                                                                                                                           |
|                                                           |                                                    | D.1.3. Effective modern point of care and laboratory based diagnostics                                                                                                  |
|                                                           |                                                    | D.1.4. Laboratory quality system                                                                                                                                        |
|                                                           | D.2 Real Time Surveillance Systems                 | D.2.1. Indicator and event based surveillance systems                                                                                                                   |
|                                                           |                                                    | D.2.2. Interoperable, interconnected, electronic real-time reporting system                                                                                             |
|                                                           |                                                    | D.2.3. Analysis of surveillance data                                                                                                                                    |
|                                                           |                                                    | D.2.4. Syndromic surveillance systems                                                                                                                                   |
|                                                           | D.3 Reporting                                      | D.3.1. System for efficient reporting to WHO, FAO and OIE                                                                                                               |
|                                                           |                                                    | D.3.2. Reporting network and protocols in country                                                                                                                       |
|                                                           | D.4 Workforce Development                          | D.4.1. Human resources are available to implement IHR core capacity requirements                                                                                        |
|                                                           |                                                    | D.4.2. Applied epidemiology training program in place such as field epidemiology training program (FETP)                                                                |
| D.4.3. Workforce strategy                                 |                                                    |                                                                                                                                                                         |
| Respond to public health emergencies                      | R.1 Preparedness                                   | R.1.1. Multi-hazard national public health emergency preparedness and response plan is developed and implemented                                                        |
|                                                           |                                                    | R.1.2. Priority public health risks and resources are mapped and utilized                                                                                               |
|                                                           | R.2 Emergency Response Operations                  | R.2.1. Capacity to activate emergency operations                                                                                                                        |
|                                                           |                                                    | R.2.2. Emergency Operations Centre (EOC) operating procedures & plans                                                                                                   |
|                                                           |                                                    | R.2.3. Emergency operations program                                                                                                                                     |
|                                                           |                                                    | R.2.4. Case management procedures are implemented for IHR relevant hazards                                                                                              |
|                                                           | R.3 Linking Public Health & Security Authorities   | R.3.1. Public health & security authorities, (e.g. law enforcement, border control, customs) are linked during a suspect or confirmed biological event                  |
|                                                           | R.4 Medical Countermeasures & Personnel Deployment | R.4.1. System is in place for sending and receiving medical countermeasures during a public health emergency                                                            |
|                                                           |                                                    | R.4.2. System is in place for sending and receiving health personnel during a public health emergency                                                                   |
|                                                           | R.5 Risk Communication                             | R.5.1. Risk communication systems (plans, mechanisms, etc.)                                                                                                             |
|                                                           |                                                    | R.5.2. Internal and partner communication & coordination                                                                                                                |
| R.5.3. Public communication                               |                                                    |                                                                                                                                                                         |
| R.5.4. Communication engagement with affected communities |                                                    |                                                                                                                                                                         |
| R.5.5. Dynamic listening and rumour management            |                                                    |                                                                                                                                                                         |
| Other health security considerations                      | Points of Entry (PoE)                              | PoE.1. Routine capacities are established at points of entry                                                                                                            |
|                                                           |                                                    | PoE.2. Effective public health response at points of entry                                                                                                              |
|                                                           | Chemical Events (CE)                               | CE.1. Mechanisms are established and functioning for detecting and responding to chemical events or emergencies                                                         |
|                                                           |                                                    | CE.2. Enabling environment is in place for management of chemical events                                                                                                |
|                                                           | Radiation Emergencies (RE)                         | RE.1. Mechanisms are established and functioning for detecting and responding to radiological & nuclear emergencies                                                     |
|                                                           |                                                    | RE.2. Enabling environment is in place for management of radiation emergencies                                                                                          |

**Figure 2.** The geographic distribution of the ten countries included in analysis.

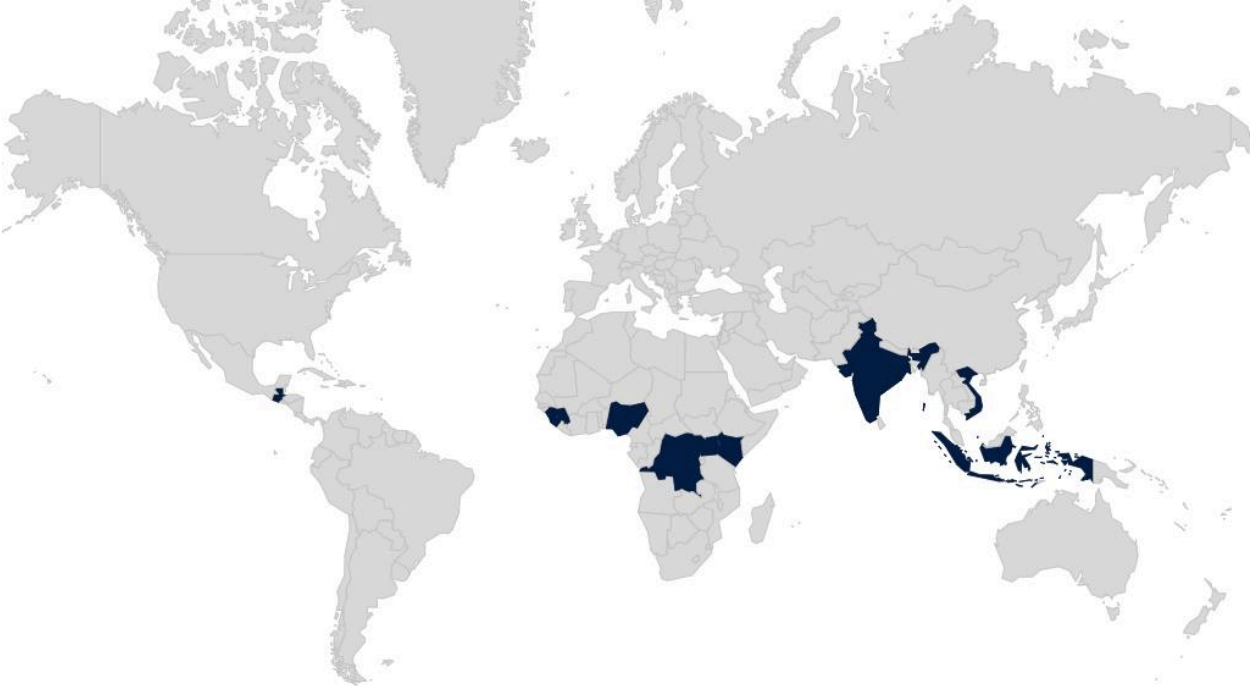

Supplement: mmc1.pdf [file mmc1.pdf]
